# Supplementary material for: Production of nascent ribosome precursors within the nucleolar microenvironment of Saccharomyces cerevisiae
Source: Oxford University Press journal article supplement (doi:10.1093/genetics/iyac070), 2022-06-03
Supplement: iyac070_supplementary_data.pdf [file iyac070_supplementary_data.pdf]

**Supplementary Tables and Table Legends**

| <b>Table S1. Subsets of Nucleolar Assembly Factors</b>                                                                                                                                                                                                                                                                                                                                                                                                                                                                                                                                                                                                                                                                                                                                                                                                                                                                 |                               |                            |                            |                              |                                                                                                                            |                                                                                                                 |
|------------------------------------------------------------------------------------------------------------------------------------------------------------------------------------------------------------------------------------------------------------------------------------------------------------------------------------------------------------------------------------------------------------------------------------------------------------------------------------------------------------------------------------------------------------------------------------------------------------------------------------------------------------------------------------------------------------------------------------------------------------------------------------------------------------------------------------------------------------------------------------------------------------------------|-------------------------------|----------------------------|----------------------------|------------------------------|----------------------------------------------------------------------------------------------------------------------------|-----------------------------------------------------------------------------------------------------------------|
| <b>Subset *</b>                                                                                                                                                                                                                                                                                                                                                                                                                                                                                                                                                                                                                                                                                                                                                                                                                                                                                                        | <b>Operative Distribution</b> | <b>Latent Distribution</b> | <b>Suggested Role</b>      | <b>Fraction Essential **</b> | <b>Non-Essential AFs <sup>x</sup></b>                                                                                      | <b>Orthologs Implicated in Disease <sup>+ °</sup></b>                                                           |
| SSU-In                                                                                                                                                                                                                                                                                                                                                                                                                                                                                                                                                                                                                                                                                                                                                                                                                                                                                                                 | Inner layer                   | Inner layer                | Initiator ?                | 2/5                          | Efg1, Nop6, Nsr1                                                                                                           |                                                                                                                 |
| SSU-F                                                                                                                                                                                                                                                                                                                                                                                                                                                                                                                                                                                                                                                                                                                                                                                                                                                                                                                  | Inner layer                   | Outer layer                | SSU knob formation         | 50/52                        | Fyv7, Rrt14                                                                                                                | BUD23 [Bud23]<br>Cirhin [Utp4]<br>DHX37 [Dhr1]<br>ESF1 [Esf1]<br>UTP14 [Utp14]<br>WDR36 [Utp21]<br>WDR43 [Utp5] |
| LSU-Ou                                                                                                                                                                                                                                                                                                                                                                                                                                                                                                                                                                                                                                                                                                                                                                                                                                                                                                                 | Outer layer                   | Outer layer                | LSU knob formation         | 38/55                        | Abl1, Arx1, Bmt2, Bud20, Bud23, Cic1, Dbp7, Fpr3, Fpr4, Mrt4, Nop12, Nop13, Nop16, Puf6, Rae1/Gle2, Rcm1, Ssf1, Ssf2, Tri1 | DCAF13 [Sof1]<br>DNAJC21 [Jjj1]                                                                                 |
| LSU-F                                                                                                                                                                                                                                                                                                                                                                                                                                                                                                                                                                                                                                                                                                                                                                                                                                                                                                                  | Outer layer                   | Inner layer                | Initiator ?                | 3/4                          | Rsa3                                                                                                                       |                                                                                                                 |
| snoRNP proteins                                                                                                                                                                                                                                                                                                                                                                                                                                                                                                                                                                                                                                                                                                                                                                                                                                                                                                        | Inner layer                   | Inner layer                | modify rRNA                | 7/7                          | none                                                                                                                       | DKC1 [Cbf5]<br><i>SNORD118 #</i>                                                                                |
| Rnt1, nuclease                                                                                                                                                                                                                                                                                                                                                                                                                                                                                                                                                                                                                                                                                                                                                                                                                                                                                                         | Inner layer                   | Inner layer                | removal of SSU knobs       |                              |                                                                                                                            | nuclease:<br>LAS1L<br><i>RMRP #</i>                                                                             |
| Rcl1, nuclease                                                                                                                                                                                                                                                                                                                                                                                                                                                                                                                                                                                                                                                                                                                                                                                                                                                                                                         | Outer layer                   | Outer layer                | release of transcripts     |                              |                                                                                                                            |                                                                                                                 |
| Rrp5                                                                                                                                                                                                                                                                                                                                                                                                                                                                                                                                                                                                                                                                                                                                                                                                                                                                                                                   | Inner layer                   | Outer layer                | binds ITS1                 |                              |                                                                                                                            |                                                                                                                 |
| rDNAPs                                                                                                                                                                                                                                                                                                                                                                                                                                                                                                                                                                                                                                                                                                                                                                                                                                                                                                                 | Axis                          | Axis                       | Packaging of rDNA ?        |                              | Csm1, Fob1, Hmo1, Lrs4, Sir2, Tof2, Top1                                                                                   |                                                                                                                 |
| Other (Pol A, Dbp3, Prp43)                                                                                                                                                                                                                                                                                                                                                                                                                                                                                                                                                                                                                                                                                                                                                                                                                                                                                             | Inner layer                   | Inner layer                | transcription, early steps |                              |                                                                                                                            | TCOF1, POLR1A [Rpa190]<br>POLR1C/D [RPA/C19; RPA/C40]                                                           |
| <p>* The naming conventions for these proteins and localizations are explained in Table 1 and in [1]. Additional human genes for which mutation impairs ribosome production are DDX11, DDX21, NOL11, PAK1IP1. There is little information concerning which subunits are affected. Orthologs have not been identified.</p> <p>** In the "Fraction Essential" column we indicate, for each category, the number of proteins that can be deleted, singly, without interrupting growth [2]. Each denominator indicates the total number of proteins in the category that have been examined.</p> <p><sup>x</sup> Not required for mitotic growth, although growth may slow [2].</p> <p><sup>°</sup> [3, 4].</p> <p><sup>+</sup> Name of HUMAN GENE [Yeast name]. The homolog of Sdo1 (SBDS) is mutated in Schwachman-Diamond syndrome. Sdo1 is not concentrated in the nucleolus.</p> <p><sup>#</sup> Non-coding RNAs.</p> |                               |                            |                            |                              |                                                                                                                            |                                                                                                                 |

**Table S1** Subsets of Assembly Factors - related to Table 1

In addition to the information summarized in Table 1 and Table S2, this table specifies the suggested role of each subset of AFs and the fraction of the AFs in each group that are essential for mitotic growth [2]. We also list those for which homologs in man have been implicated in disease. The group of non-essential AFs in yeast includes proteins associated with the 5'-ETS (Bud21, Nan1/Utp17), other proteins required for making the SSU (Bud22, Cms1, Efg1, Fyv7, Nsr1, Rrp8, Rrt14, Slx9, Utp30) and proteins required for making the LSU (Bmt2, Bud20, Cgr1, Cic1/Nsa3, Dbp7, Fpr3, Fpr4, Jjj1, Loc1, Mrt4, Ngl2, Nop12, Nop13, Nop16, Puf6, Rrp6, Ssf1, Ssf2, Tri1).

*Collection of data.* The *Saccharomyces* Genome Database (SGD) was used to gather information on the abundance, molecular weight and amino acid sequence of assembly factors. For that database, BioPerl and CODONW were used to calculate isoelectric points and abundance data were averaged from multiple quantitative analyses of cells under standard growth conditions [5]. Predictor of Natural Disordered Regions (PONDR) was used to predict overall disorder based on the amino acid sequence (<http://www.pondr.com/>). FoldIndex was also used to make such estimates and the two algorithms gave similar estimates.

For human proteins, we used UniProt Knowledgebase (UniProtKB) and ExPASy to retrieve molecular weight and isoelectric point information. PONDR was again used to predict order.

**Table S2. Master List of Assembly Factors and Their Physical Properties**

| name                  | name      | MW (kDa) | MW (kDa) | IEP   | IEP   | predicted disorder (%) | predicted disorder (%) | abundance mean | abundance STD | subset  | tripartite domain |
|-----------------------|-----------|----------|----------|-------|-------|------------------------|------------------------|----------------|---------------|---------|-------------------|
| Nan1/Utp17 *          | WDR75     | 101.22   | 94.49    | 6.31  | 5.65  | 17.58                  | 17.31                  | 6811           | 3486          | SSU-F   | 5'-ETS            |
| Utp5 *                | WDR43     | 71.96    | 74.89    | 4.56  | 5.37  | 34.53                  | 27.62                  | 6874           | 7312          | SSU-F   | 5'-ETS            |
| Utp6                  | UTP6      | 52.43    | 41.53    | 9.33  | 7.59  | 20.68                  | 16.25                  | 4712           | 2273          | SSU-F   | 5'-ETS            |
| Utp8                  |           | 80.16    |          | 4.78  |       | 18.93                  |                        | 7512           | 3299          | SSU-F   | 5'-ETS            |
| Utp9                  |           | 65.23    |          | 4.48  |       | 24.7                   |                        | 8516           | 7706          | SSU-F   | 5'-ETS            |
| Utp13 *               | TBL3      | 91.00    | 89.03    | 5.06  | 6.44  | 21.05                  | 21.41                  | 6417           | 4007          | SSU-F   | 5'-ETS            |
| Utp15 *               | UTP15     | 57.70    | 58.41    | 9.76  | 9.18  | 28.65                  | 23.94                  | 4549           | 3327          | SSU-F   | 5'-ETS            |
| Utp18 *               | UTP18     | 66.39    | 62.00    | 4.61  | 8.93  | 31.99                  | 33.63                  | 6638           | 7492          | SSU-F   | 5'-ETS            |
| Utp21 *               | WDR36     | 104.79   | 105.32   | 7.89  | 7.33  | 23                     | 19.24                  | 4129           | 2115          | SSU-F   | 5'-ETS            |
| Bud21/Utp16           |           | 24.38    |          | 6.55  |       | 83.64                  |                        | 3559           | 2746          | unknown | 5'-ETS            |
| Dip2/Utp12 *          | WDR3      | 106.32   | 106.09   | 5.89  | 6.2   | 21                     | 24.18                  | 5172           | 3868          | unknown | 5'-ETS            |
| Fcf2                  | DNTP2     | 25.64    | 84.46    | 10.17 | 5.86  | 71.43                  | 60.58                  | 3755           | 1318          | unknown | 5'-ETS            |
| Imp3 #                | IMP3      | 21.89    | 21.85    | 10.33 | 9.54  | 22.4                   | 30.43                  | 5499           | 5796          | unknown | 5'-ETS            |
| Imp4 +                | IMP4      | 33.48    | 21.85    | 9.5   | 9.54  | 31.38                  | 30.43                  | 4976           | 2363          | unknown | 5'-ETS            |
| Mpp10                 | MPHOSPH10 | 66.89    | 78.86    | 4.27  | 4.77  | 66.27                  | 59.18                  | 6676           | 3779          | unknown | 5'-ETS            |
| Pwp2/Utp1 *           | PWP2      | 103.94   | 102.45   | 4.71  | 5.76  | 17.44                  | 17.3                   | 5498           | 4011          | unknown | 5'-ETS            |
| Rrp9 *                | RRP9      | 65.04    | 51.84    | 5.43  | 7.97  | 34.73                  | 38.53                  | 4905           | 1950          | unknown | 5'-ETS            |
| Sas10/Utp3            | UTP3      | 70.19    | 54.55    | 4.32  | 5.5   | 59.18                  | 64.93                  | 6159           | 3201          | unknown | 5'-ETS            |
| Sof1 *                | DCAF13    | 56.80    | 51.40    | 9.91  | 9.3   | 36.61                  | 17.53                  | 4982           | 2024          | unknown | 5'-ETS            |
| Utp4 *                | CIRH1A    | 87.79    | 76.89    | 6.52  | 9.03  | 18.17                  | 4.37                   | 4299           | 2439          | unknown | 5'-ETS            |
| Utp7/Kre31 *          | WDR46     | 62.33    | 68.07    | 10.02 | 9.69  | 45.31                  | 52.3                   | 6067           | 2569          | unknown | 5'-ETS            |
| Utp10 -               | HEAR1     | 200.06   | 242.37   | 6.44  | 6.11  | 13.23                  | 18.24                  | 8060           | 3856          | unknown | 5'-ETS            |
| Utp11                 | UTP11L    | 29.76    | 30.00    | 10.91 | 10.08 | 76.4                   | 64.8                   | 2954           | 1720          | unknown | 5'-ETS            |
| Dbp8 †                | DDX49     | 47.89    | 54.22    | 10.24 | 9.21  | 21.63                  | 29.24                  | 3904           | 3732          | SSU-F   | pre-40S           |
| Dhr2 †                |           | 82.73    |          | 9.22  |       | 33.47                  |                        | 1734           | 1002          | SSU-F   | pre-40S           |
| Fyv7                  |           | 18.21    |          | 10.99 |       | 87.42                  |                        | 2403           | 1324          | SSU-F   | pre-40S           |
| Noc4/Utp19 -          | NOC4L     | 63.62    | 58.46    | 6.01  | 7.08  | 14.31                  | 26.16                  | 3607           | 1572          | SSU-F   | pre-40S           |
| Rrp7                  | RRP7A     | 34.47    | 32.33    | 9.35  | 9.61  | 36.36                  | 51.07                  | 5813           | 2489          | SSU-F   | pre-40S           |
| Utp30                 | RSL1D1    | 31.63    | 54.97    | 10.15 | 10.13 | 24.82                  | 49.59                  | 3195           | 1655          | SSU-F   | pre-40S           |
| Efg1                  |           | 27.13    |          | 10.15 |       | 66.09                  |                        | 4774           | 2174          | SSU-In  | pre-40S           |
| Hca4/Dbp4/<br>Ecm24 † | DDX10     | 87.19    | 100.88   | 7.47  | 8.72  | 39.09                  | 42.4                   | 6606           | 7745          | SSU-In  | pre-40S           |
| Nop6 #                |           | 25.23    |          | 10.87 |       | 64.44                  |                        | 5962           | 3007          | SSU-In  | pre-40S           |
| Nop9 #&               | NOP9      | 77.72    | 69.43    | 8.38  | 6.86  | 22.07                  | 46.23                  | 4330           | 1859          | SSU-In  | pre-40S           |
| Nsr1/She5 #           | NCL       | 44.51    | 76.61    | 4.58  | 4.6   | 63.53                  | 55.49                  | 25614          | 21560         | SSU-In  | pre-40S           |
| Bfr2                  | AATF      | 61.16    | 63.13    | 4.41  | 4.82  | 37.88                  | 55.89                  | 7791           | 3997          | unknown | pre-40S           |
| Bms1 ^                | BMS1      | 135.56   | 145.80   | 6.79  | 6.04  | 48.77                  | 42.59                  | 4889           | 3601          | unknown | pre-40S           |
| Bud22                 | SRFBP1    | 60.06    | 48.63    | 9.28  | 9.59  | 48.55                  | 59.44                  | 3797           | 1934          | unknown | pre-40S           |
| Bud23 %               | WBSCR22   | 30.74    | 31.88    | 9.48  | 8.95  | 34.18                  | 44.13                  | 4328           | 2802          | unknown | pre-40S           |
| Cms1                  | CMSS1     | 33.39    | 31.88    | 8.56  | 9.26  | 35.05                  | 38.35                  | 4906           | 3267          | unknown | pre-40S           |
| Dim1 %                | PNO1      | 35.96    | 27.92    | 10.16 | 9.75  | 28.3                   | 48.02                  | 5449           | 3874          | unknown | pre-40S           |
| Dim2 #                | PNO1      | 30.33    | 27.92    | 9.71  | 9.75  | 52.55                  | 48.02                  | 5172           | 2826          | unknown | pre-40S           |
| Ecm16/Dhr1 †          | DHX37     | 144.93   | 129.54   | 6.26  | 8.36  | 40.49                  | 46.59                  | 4312           | 1955          | unknown | pre-40S           |
| Emg1/Nep1 %           | EMG1      | 27.89    | 26.72    | 8.58  | 9.28  | 20.24                  | 27.46                  | 7148           | 5216          | unknown | pre-40S           |
| Enp1/Meg1             | BYSL      | 55.10    | 49.60    | 4.56  | 8.19  | 39.96                  | 47.83                  | 7222           | 4442          | unknown | pre-40S           |
| Enp2 *                | NOL10     | 81.72    | 80.30    | 6.54  | 8.64  | 48.09                  | 31.54                  | 5078           | 2812          | unknown | pre-40S           |
| Esf2/Abt1 #           |           | 36.40    |          | 8.37  |       | 67.41                  |                        | 4489           | 3189          | unknown | pre-40S           |
| Faf1                  |           | 38.89    |          | 10.02 |       | 73.41                  |                        | 2182           | 1168          | unknown | pre-40S           |
| Fal1 †                | EIF4A3    | 45.22    | 46.87    | 9.49  | 6.3   | 16.79                  | 30.41                  | 2165           | 629           | unknown | pre-40S           |
| Kre33/Rra1            | NAT10     | 119.35   | 115.72   | 7.94  | 8.5   | 32.43                  | 31.28                  | 8767           | 5717          | unknown | pre-40S           |
| Kri1                  | KRI1      | 68.62    | 82.30    | 4.74  | 5.06  | 57.06                  | 60.77                  | 9342           | 12381         | unknown | pre-40S           |
| Krr1 #                | KRR1      | 37.17    | 43.66    | 10    | 9.78  | 49.05                  | 43.31                  | 6288           | 3601          | unknown | pre-40S           |
| Lcp5                  | NGDN      | 40.79    | 35.89    | 6.91  | 9.57  | 62.59                  | 61.13                  | 2006           | 1325          | unknown | pre-40S           |

Table S2 (contd.)

| Table S2. Master List of Assembly Factors and Their Physical Properties |           |          |          |       |       |                        |                        |                |               |         |                   |
|-------------------------------------------------------------------------|-----------|----------|----------|-------|-------|------------------------|------------------------|----------------|---------------|---------|-------------------|
| name                                                                    | name      | MW (kDa) | MW (kDa) | IEP   | IEP   | predicted disorder (%) | predicted disorder (%) | abundance mean | abundance STD | subset  | tripartite domain |
| Mrd1 #                                                                  | RBM19     | 101.11   | 107.33   | 6.5   | 6.13  | 46.34                  | 35.34                  | 4887           | 3492          | unknown | pre-40S           |
| Nop14/Utp2                                                              | NOP14     | 94.30    | 97.66    | 7.44  | 7.33  | 47.04                  | 55.19                  | 5441           | 3311          | unknown | pre-40S           |
| Rio1/Rrp10                                                              | RIOK1     | 56.11    | 65.45    | 6.53  | 5.84  | 36.57                  | 44.27                  | 2556           | 1383          | unknown | pre-40S           |
| Rok1 †                                                                  | DDX52     | 63.67    | 67.49    | 9.73  | 9.69  | 49.38                  | 28.05                  | 7571           | 8349          | unknown | pre-40S           |
| Rrp3 †                                                                  | DDX47     | 55.98    | 50.64    | 9.71  | 9.18  | 31.54                  | 39.34                  | 5173           | 2608          | unknown | pre-40S           |
| Rrp12 ·                                                                 | RRP12     | 137.50   | 143.70   | 7.02  | 8.97  | 25.81                  | 34.77                  | 7240           | 3716          | unknown | pre-40S           |
| Rrt14                                                                   |           | 23.86    |          | 10.56 |       | 82.04                  |                        | 3228           | 2867          | unknown | pre-40S           |
| Sgd1 &                                                                  | NOM1      | 102.84   | 96.25    | 5.74  | 8.28  | 36.93                  | 53.72                  | 2544           | 1238          | unknown | pre-40S           |
| Slx9                                                                    |           | 24.08    |          | 10.73 |       | 59.52                  |                        | 4639           | 1530          | unknown | pre-40S           |
| Utp14                                                                   | UTP14A    | 102.97   | 87.97    | 4.68  | 7.67  | 73.08                  | 71.47                  | 5126           | 2989          | unknown | pre-40S           |
| Utp14                                                                   | UTP14C    | 102.97   | 87.18    | 4.68  | 6.7   | 71.87                  | 63.17                  | 5126           | 2989          | unknown | pre-40S           |
| Utp20 &                                                                 | UTP20     | 287.55   | 318.38   | 7.03  | 7.07  | 12.99                  | 21.17                  | 3802           | 2320          | unknown | pre-40S           |
| Utp22                                                                   | NOL6      | 140.49   | 127.59   | 8.72  | 7.42  | 28.91                  | 15.82                  | 7828           | 4461          | unknown | pre-40S           |
| Utp23                                                                   | UTP23     | 28.82    | 28.40    | 10.74 | 10.08 | 50                     | 33.73                  | 3903           | 1531          | unknown | pre-40S           |
| Brx1 +                                                                  | BRX1      | 33.54    | 44.40    | 9.81  | 9.92  | 28.52                  | 47.88                  | 10449          | 4015          | LSU-Ou  | pre-LSU           |
| Cic1/Nsa3                                                               | RSL1D1    | 42.53    | 54.97    | 9.39  | 10.13 | 27.13                  | 49.59                  | 11772          | 9346          | LSU-Ou  | pre-LSU           |
| Fpr3/Npi46                                                              | FPR3      | 46.49    | 39.96    | 4.09  | 8.12  | 79.08                  | 11.9                   | 10680          | 4750          | LSU-Ou  | pre-LSU           |
| Mak5 †                                                                  | DDX24     | 87.05    | 96.33    | 8.76  | 9.14  | 42.69                  | 44.7                   | 4105           | 2344          | LSU-Ou  | pre-LSU           |
| Mak11 *                                                                 | PAK1IP1   | 53.67    | 43.96    | 8.66  | 8.66  | 19.13                  | 18.59                  | 4910           | 2542          | LSU-Ou  | pre-LSU           |
| Mak21/Noc1 &                                                            | CEBPZ     | 116.62   | 120.97   | 4.63  | 5.65  | 35.41                  | 37.76                  | 7700           | 3421          | LSU-Ou  | pre-LSU           |
| Mrt4                                                                    | MRT04     | 27.06    | 27.56    | 8.89  | 8.34  | 33.05                  | 33.05                  | 12109          | 5199          | LSU-Ou  | pre-LSU           |
| Noc2 ·                                                                  | NOC2L     | 81.60    | 84.91    | 8.85  | 5.46  | 36.62                  | 39.12                  | 10327          | 7258          | LSU-Ou  | pre-LSU           |
| Noc3 ·                                                                  | NOC3L     | 75.57    | 92.54    | 5.71  | 9.22  | 44.95                  | 41.88                  | 5027           | 2925          | LSU-Ou  | pre-LSU           |
| Nog1 ^                                                                  |           | 74.42    |          | 9.18  |       | 41.58                  |                        | 14566          | 7766          | LSU-Ou  | pre-LSU           |
| Nop2/Yna1 %                                                             | NOP2      | 69.78    | 89.30    | 4.68  | 9.27  | 52.91                  | 60.84                  | 11196          | 4039          | LSU-Ou  | pre-LSU           |
| Nop4/Nop77 #                                                            | RBM28     | 77.84    | 85.73    | 9.67  | 9.26  | 63.21                  | 61.26                  | 5443           | 2689          | LSU-Ou  | pre-LSU           |
| Nop7/Yph1                                                               | PES1      | 69.86    | 68.00    | 5.26  | 6.93  | 44.46                  | 41.84                  | 10235          | 6330          | LSU-Ou  | pre-LSU           |
| Nop13 #                                                                 |           | 45.62    |          | 9.94  |       | 59.06                  |                        | 6924           | 3734          | LSU-Ou  | pre-LSU           |
| Nop15 #                                                                 |           | 25.45    |          | 9.91  |       | 53.18                  |                        | 7498           | 2435          | LSU-Ou  | pre-LSU           |
| Nop16                                                                   | NOP16     | 51.74    | 46.67    | 8.71  | 6.72  | 27.4                   | 23.84                  | 6417           | 2633          | LSU-Ou  | pre-LSU           |
| Puf6 # &                                                                |           | 75.10    |          | 6.88  |       | 42.23                  |                        | 9678           | 6137          | LSU-Ou  | pre-LSU           |
| Rix7                                                                    | NVL       | 93.05    | 95.05    | 5     | 6.11  | 46.24                  | 40.54                  | 5682           | 4006          | LSU-Ou  | pre-LSU           |
| Rrp1                                                                    | RRP1      | 33.19    | 52.83    | 4.92  | 9.39  | 24.1                   | 64.21                  | 5406           | 2431          | LSU-Ou  | pre-LSU           |
| Rrp17                                                                   | NOL12     | 27.98    | 24.66    | 10.03 | 10.22 | 59.15                  | 87.32                  | 3792           | 2128          | LSU-Ou  | pre-LSU           |
| Ssf1 +                                                                  |           | 51.77    |          | 9.96  |       | 59.16                  |                        | 5117           | 2126          | LSU-Ou  | pre-LSU           |
| Tif6/Cdc95                                                              | EIF6      | 26.44    | 26.55    | 4.27  | 4.56  | 52.65                  | 28.57                  | 12902          | 7262          | LSU-Ou  | pre-LSU           |
| Ytm1/Cst14                                                              | WDR12     | 51.35    | 47.70    | 6.96  | 5.57  | 35                     | 15.82                  | 6698           | 3329          | LSU-Ou  | pre-LSU           |
| Dbp6 †                                                                  | DDX51     | 68.07    | 72.45    | 9.72  | 8.43  | 30.3                   | 31.83                  | 4861           | 2833          | LSU-F   | pre-LSU           |
| Rsa3                                                                    |           | 24.64    |          | 4.51  |       | 40.91                  |                        | 4878           | 1995          | LSU-F   | pre-LSU           |
| Urb1/Npa1                                                               | URB1/NPA1 | 203.28   | 254.38   | 7.35  | 6.03  | 9.52                   | 23.43                  | 4666           | 1877          | LSU-F   | pre-LSU           |
| Urb2/Npa2                                                               | URB2/NPA2 | 135.09   | 170.54   | 6.33  | 6.97  | 9.63                   | 12.93                  | 3932           | 2647          | LSU-F   | pre-LSU           |
| Bmt2 %                                                                  | BMT2      | 38.57    | 46.32    | 10.28 | 5.75  | 26.71                  | 27.65                  | 803            | 687           | unknown | pre-LSU           |
| Bud20                                                                   | ZNF93     | 18.52    | 15.19    | 9.3   | 9.9   | 50.6                   | 79.85                  | 5349           | 2142          | unknown | pre-LSU           |
| Cgr1                                                                    |           | 14.43    |          | 11.2  |       | 97.5                   |                        | 4596           | 2094          | unknown | pre-LSU           |
| Dbp7 †                                                                  | DDX31     | 83.33    | 94.08    | 9.84  | 10.01 | 22.91                  | 40.54                  | 2715           | 1711          | unknown | pre-LSU           |
| Dbp9 †                                                                  | DDX56     | 68.07    | 61.58    | 9.72  | 9.34  | 33.52                  | 32.8                   | 7865           | 7383          | unknown | pre-LSU           |
| Dbp10 †                                                                 | DDX54     | 112.96   | 98.59    | 9.71  | 10.03 | 38.77                  | 51.38                  | 5311           | 3228          | unknown | pre-LSU           |
| Drs1 †                                                                  | DDX27     | 84.83    | 89.83    | 5.41  | 9.33  | 55.98                  | 46.48                  | 5785           | 2903          | unknown | pre-LSU           |
| Ebp2                                                                    | EBNA1BP2  | 49.72    | 34.85    | 6.34  | 10.1  | 68.85                  | 50                     | 11139          | 10585         | unknown | pre-LSU           |
| Erb1 *                                                                  |           | 91.66    |          | 4.8   |       | 37.79                  |                        | 8395           | 4787          | unknown | pre-LSU           |
| Fpr4                                                                    |           | 43.86    |          | 4.31  |       | 66.07                  |                        | 10074          | 6507          | unknown | pre-LSU           |
| Ipi1 &                                                                  |           | 37.88    |          | 10.14 |       | 18.26                  |                        | 3250           | 1614          | unknown | pre-LSU           |
| Ipi3 *                                                                  |           | 61.76    |          | 5.5   |       | 15.5                   |                        | 5697           | 2575          | unknown | pre-LSU           |

Table S2 (contd.)

| Table S2. Master List of Assembly Factors and Their Physical Properties |         |          |          |       |       |                        |                        |                |               |          |                   |
|-------------------------------------------------------------------------|---------|----------|----------|-------|-------|------------------------|------------------------|----------------|---------------|----------|-------------------|
| name                                                                    | name    | MW (kDa) | MW (kDa) | IEP   | IEP   | predicted disorder (%) | predicted disorder (%) | abundance mean | abundance STD | subset   | tripartite domain |
| Jjj1                                                                    | DNAJC21 | 68.77    | 62.02    | 6.11  | 5.34  | 47.29                  | 56.69                  | 2082           | 1449          | unknown  | pre-LSU           |
| Loc1                                                                    |         | 23.62    |          | 11.07 |       | 79.9                   |                        | 5272           | 4337          | unknown  | pre-LSU           |
| Mak16                                                                   | MAK16   | 35.68    | 35.36    | 4.9   | 5.27  | 48.37                  | 60                     | 4068           | 1908          | unknown  | pre-LSU           |
| Ng12                                                                    | PDE12   | 59.54    | 67.35    | 7.96  | 6.11  | 29.32                  | 26.27                  | 4050           | 2114          | unknown  | pre-LSU           |
| Nip7                                                                    | NIP7    | 20.38    | 20.64    | 9.75  | 8.66  | 12.15                  | 11.1                   | 8306           | 2906          | unknown  | pre-LSU           |
| Nop8 #                                                                  |         | 56.95    |          | 5.75  |       | 45.87                  |                        | 7413           | 12383         | unknown  | pre-LSU           |
| Nop12 #                                                                 | RBM34   | 51.96    | 48.56    | 10.13 | 10.11 | 45.11                  | 51.32                  | 7772           | 3542          | unknown  | pre-LSU           |
| Nop53                                                                   | NOP53   | 52.57    | 54.38    | 10.04 | 10.32 | 57.36                  | 83.26                  | 5690           | 3023          | unknown  | pre-LSU           |
| Nsa1                                                                    | WDR74   | 51.90    | 42.44    | 8.06  | 8.64  | 23.11                  | 29.87                  | 5501           | 2937          | unknown  | pre-LSU           |
| Nsa2                                                                    | NSA2    | 29.75    | 30.06    | 10.97 | 10.28 | 58.24                  | 56.54                  | 35483          | 35752         | unknown  | pre-LSU           |
| Nug1 ^                                                                  | NUGGC   | 57.71    | 91.13    | 9.44  | 8.85  | 42.88                  | 39.07                  | 10176          | 5823          | unknown  | pre-LSU           |
| Rcm1 %                                                                  |         | 56.18    |          | 9.02  |       | 25.1                   |                        | 2016           | 1355          | unknown  | pre-LSU           |
| Rea1/Mdn1                                                               | MDN1    | 559.08   | 632.82   | 4.63  | 5.46  | 24.99                  | 28.43                  | 5887           | 5392          | unknown  | pre-LSU           |
| Rix1/Ipi2                                                               | PELP1   | 86.71    | 119.69   | 5.34  | 4.29  | 18.35                  | 61.33                  | 4644           | 2074          | unknown  | pre-LSU           |
| Rlp7                                                                    |         | 36.57    |          | 10.14 |       | 53.42                  |                        | 8857           | 3068          | unknown  | pre-LSU           |
| Rlp24                                                                   | RSL24D1 | 23.98    | 19.62    | 10.21 | 9.99  | 70.85                  | 47.24                  | 6004           | 4065          | unknown  | pre-LSU           |
| Rpf1 +                                                                  | RPF1    | 35.13    | 40.11    | 10.08 | 10.01 | 31.19                  | 40.4                   | 6121           | 3435          | unknown  | pre-LSU           |
| Rpf2 +                                                                  | RPF2    | 39.60    | 35.58    | 9.57  | 10    | 39.83                  | 33.99                  | 9388           | 7843          | unknown  | pre-LSU           |
| Rrb1 *                                                                  | GRWD1   | 52.21    | 49.41    | 4.23  | 4.82  | 40.12                  | 30.94                  | 9170           | 5803          | unknown  | pre-LSU           |
| Rrp6                                                                    | EXOSC10 | 84.03    | 100.83   | 7.15  | 8.68  | 30.42                  | 30.73                  | 4148           | 2743          | unknown  | pre-LSU           |
| Rrp8 %                                                                  |         | 46.00    |          | 10.1  |       | 39.03                  |                        | 4016           | 1322          | unknown  | pre-LSU           |
| Rrp15                                                                   | RRP15   | 28.20    | 31.48    | 5.43  | 5.39  | 65.6                   | 74.82                  | 5969           | 1870          | unknown  | pre-LSU           |
| Rrs1                                                                    | RRS1    | 22.97    | 41.19    | 10.14 | 10.69 | 58.62                  | 43.96                  | 8448           | 3397          | unknown  | pre-LSU           |
| Rsa4 *                                                                  | NLE1    | 57.03    | 53.32    | 9.18  | 6.92  | 16.89                  | 15.88                  | 4313           | 2097          | unknown  | pre-LSU           |
| Sda1 &                                                                  |         | 86.61    |          | 6.93  |       | 47.98                  |                        | 4189           | 3101          | unknown  | pre-LSU           |
| Spb1 %                                                                  | FTSJ3   | 96.48    | 96.55    | 8.29  | 8.53  | 50.89                  | 61.98                  | 5451           | 3109          | unknown  | pre-LSU           |
| Spb4 l                                                                  | DDX55   | 69.43    | 68.54    | 9.54  | 9.32  | 28.22                  | 26.17                  | 3067           | 1157          | unknown  | pre-LSU           |
| Sqt1 *                                                                  |         | 47.12    |          | 4.09  |       | 22.74                  |                        | 7749           | 3699          | unknown  | pre-LSU           |
| Ssf2 +                                                                  |         | 51.86    |          | 9.69  |       | 56.73                  |                        | 2659           | 1604          | unknown  | pre-LSU           |
| Tri1                                                                    |         | 26.48    |          | 10.16 |       | 50.44                  |                        | 2300           | 1066          | unknown  | pre-LSU           |
| Fcf1/Utp24                                                              | FCF1    | 21.63    | 23.36    | 10.48 | 9.74  | 37.04                  | 49.49                  | 2689           | 1920          | nuclease | N/A               |
| Las1                                                                    | LAS1L   | 59.35    | 83.06    | 8.05  | 4.64  | 25.3                   | 35.69                  | 1146           | 597           | nuclease | N/A               |
| Nob1                                                                    | NOB1    | 51.74    | 46.67    | 8.71  | 6.72  | 43.14                  | 29.13                  | 5287           | 3149          | nuclease | N/A               |
| Rcl1                                                                    | RCL1    | 40.17    | 40.84    | 9.23  | 9.36  | 34.33                  | 23.32                  | 6025           | 2731          | nuclease | N/A               |
| Rnt1                                                                    |         | 54.07    |          | 9.06  |       | 36.52                  |                        | 2800           | 1291          | nuclease | N/A               |
| Dbp3                                                                    |         | 58.84    |          | 9.73  |       | 20.84                  |                        | 13426          | 7719          | shared   | N/A               |
| Has1                                                                    | DDX18   | 56.73    | 75.40    | 9.88  | 9.52  | 23.98                  | 31.04                  | 12037          | 4084          | shared   | N/A               |
| Prp43/Ja1                                                               | DHX15   | 87.54    | 90.93    | 6.38  | 7.12  | 39.11                  | 40.13                  | 8852           | 3735          | shared   | N/A               |
| Rrp5                                                                    | PDCD11  | 193.11   | 208.70   | 6.07  | 8.99  | 32.97                  | 26.56                  | 15799          | 9124          | shared   | N/A               |
| Cbf5                                                                    | DKC1    | 54.71    | 57.67    | 9.34  | 9.46  | 29.81                  | 36.19                  | 18964          | 8567          | snoRNP   | N/A               |
| Gar1                                                                    | GAR1    | 21.50    | 22.34    | 11.99 | 10.91 | 37.56                  | 31.34                  | 19463          | 10558         | snoRNP   | N/A               |
| Nhp2                                                                    | NHP2    | 17.13    | 17.20    | 10.45 | 8.48  | 35.26                  | 50.33                  | 16956          | 6672          | snoRNP   | N/A               |
| Nop1/Lot3                                                               | FBL     | 34.48    | 33.78    | 10.85 | 10.18 | 59.33                  | 44.24                  | 31821          | 28378         | snoRNP   | N/A               |
| Nop10                                                                   | DKCB1   | 6.64     | 7.70     | 10.78 | 10.01 | 63.79                  | 42.19                  | 14475          | 10128         | snoRNP   | N/A               |
| Nop56/Sik1                                                              | NOP56   | 56.87    | 66.04    | 9.43  | 9.24  | 28.57                  | 44.78                  | 30862          | 19939         | snoRNP   | N/A               |
| Nop58/Nop5                                                              | NOP58   | 56.96    | 59.57    | 9.55  | 9.03  | 44.23                  | 36.86                  | 27653          | 9644          | snoRNP   | N/A               |
| Snu13                                                                   | SNU13   | 13.57    | 14.17    | 8.04  | 8.72  | 18.25                  | 20.31                  | 50898          | 59087         | snoRNP   | N/A               |
| Csm1                                                                    |         | 21.74    |          | 4.82  |       | 8.95                   |                        | 2655           | 2061          | rDNAP    | N/A               |
| Fob1                                                                    |         | 65.30    |          | 6.1   |       | 39.58                  |                        | 1734           | 1079          | rDNAP    | N/A               |
| Hmo1                                                                    |         | 27.54    |          | 9.11  |       | 47.56                  |                        | 16564          | 14005         | rDNAP    | N/A               |
| Lrs4                                                                    |         | 39.36    |          | 10.21 |       | 62.54                  |                        | 1473           | 917           | rDNAP    | N/A               |
| Top1                                                                    |         | 90.00    |          | 9.22  |       | 34.98                  |                        | 5012           | 3280          | rDNAP    | N/A               |
| Top2                                                                    |         | 164.21   |          | 7.04  |       | 27.94                  |                        | 5856           | 4193          | rDNAP    | N/A               |

Table S2 (contd.)

| Table S2. Master List of Assembly Factors and Their Physical Properties |      |          |          |      |     |                        |                        |                |               |         |                   |
|-------------------------------------------------------------------------|------|----------|----------|------|-----|------------------------|------------------------|----------------|---------------|---------|-------------------|
| name                                                                    | name | MW (kDa) | MW (kDa) | IEP  | IEP | predicted disorder (%) | predicted disorder (%) | abundance mean | abundance STD | subset  | tripartite domain |
| Rrn3                                                                    |      | 72.34    |          | 4.34 |     | 27.43                  |                        | 469            | 554           | RRN     | N/A               |
| Rrn5                                                                    |      | 41.71    |          | 6.85 |     | 47.38                  |                        | 811            | 568           | RRN     | N/A               |
| Rrn6                                                                    |      | 102.01   |          | 4.81 |     | 34                     |                        | 542            | 739           | RRN     | N/A               |
| Rrn7                                                                    |      | 60.36    |          | 8.25 |     | 12.06                  |                        | 1192           | 1122          | RRN     | N/A               |
| Rrn9                                                                    |      | 42.79    |          | 5.02 |     | 41.92                  |                        | 638            | 516           | RRN     | N/A               |
| Rrn10                                                                   |      | 16.49    |          | 4.85 |     | 27.59                  |                        | 1408           | 1842          | RRN     | N/A               |
| Rrn11                                                                   |      | 59.24    |          | 5.85 |     | 36.29                  |                        | 706            | 456           | RRN     | N/A               |
| Rpa12                                                                   |      |          |          |      |     |                        |                        | 10655          | 5328          | RPA     | N/A               |
| Rpa14                                                                   |      |          |          |      |     |                        |                        | 7820           | 10363         | RPA     | N/A               |
| Rpa34                                                                   |      |          |          |      |     |                        |                        | 7722           | 3534          | RPA     | N/A               |
| Rpa43                                                                   |      |          |          |      |     |                        |                        | 7471           | 3109          | RPA     | N/A               |
| Rpa49                                                                   |      |          |          |      |     |                        |                        | 9948           | 3503          | RPA     | N/A               |
| Rpa135                                                                  |      |          |          |      |     |                        |                        | 12623          | 6060          | RPA     | N/A               |
| Rpa190                                                                  |      |          |          |      |     |                        |                        | 16112          | 8843          | RPA     | N/A               |
| Rpb1                                                                    |      |          |          |      |     |                        |                        | 16726          | 11053         | RPB     | N/A               |
| Rpb2                                                                    |      |          |          |      |     |                        |                        | 14925          | 6189          | RPB     | N/A               |
| Rpb3                                                                    |      |          |          |      |     |                        |                        | 8911           | 4777          | RPB     | N/A               |
| Rpb7                                                                    |      |          |          |      |     |                        |                        | 6897           | 3986          | RPB     | N/A               |
| Rpb8                                                                    |      |          |          |      |     |                        |                        | 8439           | 4971          | RPB     | N/A               |
| Rpb9                                                                    |      |          |          |      |     |                        |                        | 5395           | 2749          | RPB     | N/A               |
| Rpb11                                                                   |      |          |          |      |     |                        |                        | 10860          | 6845          | RPB     | N/A               |
| Ret1                                                                    |      |          |          |      |     |                        |                        | 4745           | 2562          | RPC     | N/A               |
| Rpc17                                                                   |      |          |          |      |     |                        |                        | 3431           | 1714          | RPC     | N/A               |
| Rpc19                                                                   |      |          |          |      |     |                        |                        | 15166          | 16514         | RPC     | N/A               |
| Rpc37                                                                   |      |          |          |      |     |                        |                        | 4592           | 3392          | RPC     | N/A               |
| Rpc40                                                                   |      |          |          |      |     |                        |                        | 15108          | 4005          | RPC     | N/A               |
| Rpc53                                                                   |      |          |          |      |     |                        |                        | 3911           | 1354          | RPC     | N/A               |
| Rpc82                                                                   |      |          |          |      |     |                        |                        | 4435           | 2123          | RPC     | N/A               |
| HHF1                                                                    |      |          |          |      |     |                        |                        | 73439          | 141532        | histone | N/A               |
| HHF2                                                                    |      |          |          |      |     |                        |                        | 119590         | 176858        | histone | N/A               |
| HHT1                                                                    |      |          |          |      |     |                        |                        | 64338          | 101323        | histone | N/A               |
| HHT2                                                                    |      |          |          |      |     |                        |                        | 57624          | 99029         | histone | N/A               |
| HTA1                                                                    |      |          |          |      |     |                        |                        | 20958          | 21428         | histone | N/A               |
| HTA2                                                                    |      |          |          |      |     |                        |                        | 64804          | 39933         | histone | N/A               |
| HTB1                                                                    |      |          |          |      |     |                        |                        | 197857         | 267074        | histone | N/A               |
| HTB2                                                                    |      |          |          |      |     |                        |                        | 117817         | 122347        | histone | N/A               |

<sup>†</sup> DExD/H-box proteins   <sup>#</sup> RNA-binding proteins   <sup>+</sup> brix domain   <sup>%</sup> methyl transferases   <sup>\*</sup> WD repeats   <sup>-</sup> HEAT repeats   <sup>&</sup> ARM repeats   <sup>^</sup> GTPases

### Table S2 Master List of Nucleolar Assembly Factors and their Physical Properties

The listed AFs are strongly concentrated in the nucleolus and are essentially absent from the nucleoplasm and cytoplasm [1]. The shaded columns correspond to yeast

values while the non-shaded columns correspond to human values. The following AFs

were not included: Pfa1/Sqs1, Rrp36, Sen1/Cik3 and Utp25.

| <b>Table S3. Physical Properties of Subgroups of Assembly Factors</b> |               |                |            |             |
|-----------------------------------------------------------------------|---------------|----------------|------------|-------------|
| <b>Motif Groupings</b>                                                |               | <b>Subunit</b> | <b>MW</b>  | <b>IEP</b>  |
| <b>ARM Motif</b>                                                      | Ipi1          | LSU            | 38         | 10.1        |
|                                                                       | Nop9          | pre-40S        | 78         | 8.4         |
|                                                                       | Puf6          | LSU            | 75         | 6.9         |
|                                                                       | Sgd1          | LSU            | 103        | 6.9         |
|                                                                       | Utp20         | SSU            | 287        | 7.0         |
|                                                                       | mean +/- S.D. |                | 116 +/- 88 | 7.8 +/- 1.2 |
| <b>Brix Domain</b>                                                    | Brx1          | LSU            | 33         | 9.8         |
|                                                                       | Imp4          | 5'-ETS         | 33         | 9.5         |
|                                                                       | Rpf1          | LSU            | 35         | 10.0        |
|                                                                       | Ssf1          | LSU            | 52         | 10.0        |
|                                                                       | Ssf2          | LSU            | 52         | 9.7         |
|                                                                       | mean +/- S.D. |                | 41 +/- 9   | 9.8 +/- 0.2 |
| <b>DEXD/H-box</b>                                                     | Dbp3          | pre-40S & LSU  | 59         | 9.7         |
|                                                                       | Dbp4/Hca4     | pre-40S        | 87         | 7.5         |
|                                                                       | Dbp6          | LSU            | 70         | 6.2         |
|                                                                       | Dbp7          | LSU            | 83         | 9.8         |
|                                                                       | Dbp8          | SSU            | 47         | 10.2        |
|                                                                       | Dbp9          | LSU            | 68         | 9.2         |
|                                                                       | Dbp10         | LSU            | 113        | 9.7         |
|                                                                       | Dhr1          | SSU            | 145        | 6.3         |
|                                                                       | Dhr2          | SSU            | 83         | 9.2         |
|                                                                       | Drs1          | LSU            | 84         | 5.4         |
|                                                                       | Fal1          | SSU            | 45         | 9.5         |
|                                                                       | Has1          | pre-40S & LSU  | 57         | 9.9         |
|                                                                       | Mak5          | LSU            | 87         | 8.8         |
|                                                                       | Prp43         | pre-40S & LSU  | 88         | 6.4         |
|                                                                       | Rok1          | pre-40S        | 63         | 9.7         |
|                                                                       | Rrp3          | SSU            | 55         | 9.7         |
|                                                                       | Spb4          | LSU            | 69         | 9.5         |
|                                                                       | mean +/- S.D. |                | 77 +/- 24  | 8.7 +/- 1.5 |
| <b>GTPases or putative GTPases</b>                                    | Bms1          | SSU            | 135        | 6.8         |
|                                                                       | Efl1          | pre-LSU        | 124        | 4.7         |
|                                                                       | Lsg1          | pre-LSU        | 73         | 9.2         |
|                                                                       | Nog1          | pre-LSU        | 74         | 9.2         |
|                                                                       | Nog2          | pre-LSU        | 55         | 10.2        |
|                                                                       | Nug1          | pre-LSU        | 58         | 9.4         |
|                                                                       | mean +/- S.D. |                | 80 +/- 32  | 8.9 +/- 1.2 |
| <b>HEAT Repeat</b>                                                    | Noc2          | LSU            | 81         | 8.8         |
|                                                                       | Noc3          | LSU            | 75         | 5.7         |
|                                                                       | Noc4/Utp19    | SSU            | 63         | 6.0         |
|                                                                       | Rrp12         | SSU            | 137        | 7.0         |
|                                                                       | Sda1          | LSU            | 87         | 6.9         |
|                                                                       | Utp10         | 5'-ETS         | 200        | 6.4         |
|                                                                       | mean +/- S.D. |                | 107 +/- 47 | 6.8 +/- 1.0 |
| <b>Methyl Transfer</b>                                                | Bmt2          | LSU            | 39         | 10.3        |
|                                                                       | Bud23         | SSU            | 32         | 9.5         |
|                                                                       | Dim1          | SSU            | 36         | 10.2        |
|                                                                       | Emg1          | pre-40S        | 28         | 8.6         |



| <b>Table S3. Physical Properties of Subgroups of Assembly Factors</b> |                  |                |           |             |
|-----------------------------------------------------------------------|------------------|----------------|-----------|-------------|
| <b>Motif Groupings</b>                                                |                  | <b>Subunit</b> | <b>MW</b> | <b>IEP</b>  |
|                                                                       | Nop1             | snoRNP/5'-ETS  | 34        | 10.8        |
|                                                                       | Nop2             | LSU            | 70        | 4.7         |
|                                                                       | Rcm1             | LSU            | 56        | 9.0         |
|                                                                       | Rrp8             | LSU            | 46        | 10.1        |
|                                                                       | Spb1             | LSU            | 96        | 8.3         |
|                                                                       | mean +/- S.D.    |                | 49 +/- 20 | 9.0 +/- 1.7 |
| <b>RNA-binding Proteins (Motifs)</b>                                  | Dim2/Pno1 (KH)   | pre-40S        | 30        | 9.7         |
|                                                                       | Esf2 (RRM)       | pre-40S        | 36        | 8.4         |
|                                                                       | Imp3 (S4 domain) | 5'-ETS         | 21        | 10.3        |
|                                                                       | Krr1 (KH)        | pre-40S        | 37        | 10.0        |
|                                                                       | Mrd1 (RRM)       | pre-40S        | 101       | 6.5         |
|                                                                       | Nop4 (RRM)       | LSU            | 77        | 9.4         |
|                                                                       | Nop6 (RRM)       | pre-40S        | 25        | 10.9        |
|                                                                       | Nop8 (RRM)       | LSU            | 57        | 5.7         |
|                                                                       | Nop9 (pumilio)   | pre40S         | 77        | 8.3         |
|                                                                       | Nop12 (RRM)      | LSU            | 51        | 12.1        |
|                                                                       | Nop13 (RRM)      | LSU            | 46        | 9.9         |
|                                                                       | Nop15 (RRM)      | LSU            | 25        | 9.9         |
|                                                                       | Nsr1 (RRM)       | pre-40S        | 44        | 4.6         |
|                                                                       | Puf6 (pumilio)   | LSU            | 75        | 6.9         |
|                                                                       | mean +/- S.D.    |                | 50 +/- 23 | 8.7 +/- 2.0 |
| <b>WD Repeat Proteins</b>                                             | Enp2             | pre-40S        | 82        | 6.5         |
|                                                                       | Erb1             | LSU            | 92        | 4.8         |
|                                                                       | Ipi3             | LSU            | 62        | 5.5         |
|                                                                       | Mak11            | LSU            | 53        | 8.7         |
|                                                                       | Rrb1             | LSU            | 52        | 4.2         |
|                                                                       | Rrp9             | 5'-ETS         | 65        | 5.4         |
|                                                                       | Rsa4             | LSU            | 57        | 9.2         |
|                                                                       | Sof1             | 5'-ETS         | 57        | 9.9         |
|                                                                       | Utp1             | 5'-ETS         | 103       | 4.7         |
|                                                                       | Utp4             | 5'-ETS         | 88        | 6.5         |
|                                                                       | Utp5             | 5'-ETS         | 72        | 4.6         |
|                                                                       | Utp7             | 5'-ETS         | 62        | 10.0        |
|                                                                       | Utp12            | 5'-ETS         | 106       | 5.9         |
|                                                                       | Utp13            | 5'-ETS         | 91        | 5.0         |
|                                                                       | Utp15            | 5'-ETS         | 57        | 9.8         |
|                                                                       | Utp17            | 5'-ETS         | 101       | 6.3         |
|                                                                       | Utp18            | 5'-ETS         | 66        | 4.6         |
|                                                                       | Utp21            | 5'-ETS         | 104       | 7.9         |
|                                                                       | Ytm1             | LSU            | 51        | 7.0         |
|                                                                       | mean +/- S.D.    |                | 75 +/- 19 | 6.6 +/-1.9  |
| <b>snoRNP Proteins</b>                                                | Cbf5             | pre-40S        | 54        | 9.3         |
|                                                                       | Gar1             | pre-40S        | 21        | 12.0        |
|                                                                       | Nhp2             | pre-40S        | 17        | 10.4        |
|                                                                       | Nop1             | snoRNP/5'-ETS  | 34        | 10.8        |
|                                                                       | Nop10            | snoRNP/pre-40S | 6         | 10.8        |
|                                                                       | Nop56/Sik1       | snoRNP/5'-ETS  | 56        | 9.4         |
|                                                                       | Nop58            | snoRNP/5'-ETS  | 57        | 9.5         |

| <b>Table S3. Physical Properties of Subgroups of Assembly Factors</b> |                |           |              |
|-----------------------------------------------------------------------|----------------|-----------|--------------|
| <b>Motif Groupings</b>                                                | <b>Subunit</b> | <b>MW</b> | <b>IEP</b>   |
| Snu13 (U3)                                                            | snoRNP/5'-ETS  | 13        | 8.0          |
| mean +/- S.D.                                                         |                | 32 +/- 19 | 10.0 +/- 1.1 |

**Table S3** Physical Properties of Subgroups of Assembly Factors

The quadrants illustrated in Figure 3B/C are differentially enriched in subsets of AFs.

This table lists the physical properties of the relevant groups.

| <b>Table S4A. Isoelectric Point and Predicted Disorder Extremes</b> |                                                     |                  |                                                    |                  |                                   |                  |
|---------------------------------------------------------------------|-----------------------------------------------------|------------------|----------------------------------------------------|------------------|-----------------------------------|------------------|
|                                                                     | <b>most acidic (&lt;25<sup>th</sup> percentile)</b> |                  | <b>most basic (&gt;75<sup>th</sup> percentile)</b> |                  | <b>most disordered (&gt; 60%)</b> |                  |
|                                                                     | <b>yeast AFs</b>                                    | <b>human AFs</b> | <b>yeast AFs</b>                                   | <b>human AFs</b> | <b>yeast AFs</b>                  | <b>human AFs</b> |
| <b>5'-ETS</b>                                                       | (< 4.72)                                            | (< 5.81)         | (> 9.69)                                           | (> 9.24)         | (> 60%)                           | (> 60%)          |
|                                                                     | <i>Pwp2</i>                                         | <i>PWP2</i>      | <i>Utp15</i>                                       | <i>DCAF13</i>    | <i>Mpp10</i>                      | <i>DNTTIP2</i>   |
|                                                                     | <i>Utp18</i>                                        | <i>WDR75</i>     | <i>Sof1</i>                                        | <i>IMP4</i>      | <i>Fcf2</i>                       | <i>UTP11L</i>    |
|                                                                     | <i>Utp5</i>                                         | <i>UTP3</i>      | <i>Utp7</i>                                        | <i>IMP3</i>      | <i>Utp11</i>                      | <i>UTP3</i>      |
|                                                                     | <i>Utp9</i>                                         | <i>WDR43</i>     | <i>Fcf2</i>                                        | <i>WDR46</i>     | <i>Bud21</i>                      |                  |
|                                                                     | <i>Sas10</i>                                        | <i>MPHOSPH10</i> | <i>Imp3</i>                                        | <i>UTP11L</i>    |                                   |                  |
|                                                                     | <i>Mpp10</i>                                        |                  | <i>Utp11</i>                                       |                  |                                   |                  |
| <b>pre-40S</b>                                                      | (< 6.53)                                            | (< 6.91)         | (> 9.93)                                           | (> 9.49)         | (> 60%)                           | (> 60%)          |
|                                                                     | <i>Rio1</i>                                         | <i>NOP9</i>      | <i>Krr1</i>                                        | <i>NGDN</i>      | <i>Lcp5</i>                       | <i>KRI1</i>      |
|                                                                     | <i>Mrd1</i>                                         | <i>UTP14C</i>    | <i>Faf1</i>                                        | <i>SRFBP1</i>    | <i>Nsr1</i>                       | <i>NGDN</i>      |
|                                                                     | <i>Ecm16</i>                                        | <i>EIF4A3</i>    | <i>Utp30</i>                                       | <i>RRP7A</i>     | <i>Nop6</i>                       | <i>UTP14C</i>    |
|                                                                     | <i>Noc4</i>                                         | <i>RBM19</i>     | <i>Efg1</i>                                        | <i>DDX52</i>     | <i>Efg1</i>                       | <i>UTP14A</i>    |
|                                                                     | <i>Sgd1</i>                                         | <i>BMS1</i>      | <i>Dim1</i>                                        | <i>PNO1</i>      | <i>Esf2</i>                       |                  |
|                                                                     | <i>Kri1</i>                                         | <i>RIOK1</i>     | <i>Dbp8</i>                                        | <i>KRR1</i>      | <i>Utp14</i>                      |                  |
|                                                                     | <i>Utp14</i>                                        | <i>KRI1</i>      | <i>Rrt14</i>                                       | <i>UTP23</i>     | <i>Faf1</i>                       |                  |
|                                                                     | <i>Nsr1</i>                                         | <i>AATF</i>      | <i>Slx9</i>                                        | <i>RSL1D1</i>    | <i>Rrt14</i>                      |                  |
|                                                                     | <i>Enp1</i>                                         | <i>NCL</i>       | <i>Utp23</i>                                       |                  | <i>Fyv7</i>                       |                  |
|                                                                     | <i>Bfr2</i>                                         |                  | <i>Nop6</i>                                        |                  |                                   |                  |
|                                                                     |                                                     |                  | <i>Fyv7</i>                                        |                  |                                   |                  |
| <b>pre-LSU</b>                                                      | (< 5.48)                                            | (< 6.09)         | (> 9.85)                                           | (> 9.93)         | (> 60%)                           | (> 60%)          |
|                                                                     | <i>Rrp15</i>                                        | <i>URB1</i>      | <i>Nop15</i>                                       | <i>RSL24D1</i>   | <i>Nop4</i>                       | <i>NOP2</i>      |
|                                                                     | <i>Drs1</i>                                         | <i>BMT2</i>      | <i>Nop13</i>                                       | <i>RPF2</i>      | <i>Rrp15</i>                      | <i>RBM28</i>     |
|                                                                     | <i>Rix1</i>                                         | <i>CEBPZ</i>     | <i>Ssf1</i>                                        | <i>DDX31</i>     | <i>Fpr4</i>                       | <i>PELP1</i>     |
|                                                                     | <i>Nop7</i>                                         | <i>WDR12</i>     | <i>Rrp17</i>                                       | <i>EBNA1BP2</i>  | <i>Ebp2</i>                       | <i>FTSJ3</i>     |
|                                                                     | <i>Rix7</i>                                         | <i>NOC2L</i>     | <i>Nop53</i>                                       | <i>RBM34</i>     | <i>Rlp24</i>                      | <i>RRP1</i>      |
|                                                                     | <i>Rrp1</i>                                         | <i>MDN1</i>      | <i>Rpf1</i>                                        | <i>RSL1D1</i>    | <i>Fpr3</i>                       | <i>RRP15</i>     |
|                                                                     | <i>Mak16</i>                                        | <i>RRP15</i>     | <i>Rrp8</i>                                        | <i>NOL12</i>     | <i>Loc1</i>                       | <i>ZNF93</i>     |
|                                                                     | <i>Erb1</i>                                         | <i>DNAJC21</i>   | <i>Nop12</i>                                       | <i>NSA2</i>      | <i>Cgr1</i>                       | <i>NOP53</i>     |
|                                                                     | <i>Nop2</i>                                         | <i>MAK16</i>     | <i>Ipi1</i>                                        | <i>NOP53</i>     |                                   | <i>NOL12</i>     |
|                                                                     | <i>Rea1</i>                                         | <i>GRWD1</i>     | <i>Rlp7</i>                                        | <i>RRS1</i>      |                                   |                  |
|                                                                     | <i>Mak21</i>                                        | <i>EIF6</i>      | <i>Rrs1</i>                                        |                  |                                   |                  |
|                                                                     | <i>Rsa3</i>                                         | <i>PELP1</i>     | <i>Tri1</i>                                        |                  |                                   |                  |
|                                                                     | <i>Fpr4</i>                                         |                  | <i>Rlp24</i>                                       |                  |                                   |                  |
|                                                                     | <i>Tif6</i>                                         |                  | <i>Bmt2</i>                                        |                  |                                   |                  |
|                                                                     | <i>Rrb1</i>                                         |                  | <i>Nsa2</i>                                        |                  |                                   |                  |
|                                                                     | <i>Sqt1</i>                                         |                  | <i>Loc1</i>                                        |                  |                                   |                  |
| <i>Fpr3</i>                                                         |                                                     | <i>Cgr1</i>      |                                                    |                  |                                   |                  |

| <b>Table S4B Outliers from the Comparison of Yeast vs Human</b> |                           |               |                            |               |                          |               |
|-----------------------------------------------------------------|---------------------------|---------------|----------------------------|---------------|--------------------------|---------------|
|                                                                 | isoelectric point outlier |               | predicted disorder outlier |               | molecular weight outlier |               |
|                                                                 | yeast homolog             | human homolog | yeast homolog              | human homolog | yeast homolog            | human homolog |
| <b>5'-ETS</b>                                                   | Fcf2                      | DNTTIP2       | Sof1                       | DCAF13        | Utp10                    | HEAR1         |
|                                                                 | Utp18                     | UTP18         |                            |               | Fcf2                     | DNTTIP2       |
| <b>pre-40S</b>                                                  | Utp14                     | UTP14A        | Nop9                       | NOP9          | Utp30                    | RSL1D1        |
|                                                                 | Fal1                      | EIF4A3        | Utp30                      | RSL1D1        | Utp20                    | UTP20         |
|                                                                 | Enp1                      | BYSL          |                            |               | Nsr1                     | NCL           |
| <b>pre-LSU</b>                                                  | Ebp2                      | EBNA1BP2      | Rrp1                       | RRP1          | Rix1                     | PELP1         |
|                                                                 | Drs1                      | DDX27         | Rix1                       | PELP1         | Nug1                     | NUGGC         |
|                                                                 | Fpr3                      | FPR3          | Fpr3                       | FPR3          | Urb2                     | URB2          |
|                                                                 | Rrp1                      | RRP1          |                            |               | Urb1                     | URB1          |
|                                                                 | Bmt2                      | BMT2          |                            |               | Rea1                     | MDN1          |
|                                                                 | Nop2                      | NOP2          |                            |               |                          |               |

**Table S4** Extreme Values of Physical Parameters of Assembly Factors - related to Figure 2

**(A) Isoelectric point and predicted disorder extremes for principal subsets (5'-ETS, pre-40S, pre-LSU) in both yeast and man.** AFs are listed from top-down in order of increasing acidity for the most acidic and increasing basicity for the most basic. The entries for predicted disorder are organized in comparable fashion. The italicized AFs are those for which both yeast and human homologs have extreme values. The AFs that appear in multiple lists of extremes are highlighted.

**(B) Outliers from the comparison of yeast vs human principal groups of AFs (5'-ETS, pre-40S, pre-LSU).** Homolog pairs are listed from top-down in order of increasing difference between yeast and human values. The AFs that appeared in multiple lists of outliers are highlighted.

### ***IQR Rule***

The interquartile range (IQR) was calculated by subtracting the first quartile ( $Q_1$ ) from the third quartile ( $Q_3$ ) in each set of AF parameters. The boundaries for low and high outliers were then determined using the IQR rule (Equation 1, Equation 2).

$$\text{low outliers} < Q_1 - 1.5 * IQR \quad \text{Eq. 1}$$

$$\text{high outliers} > Q_3 + 1.5 * IQR \quad \text{Eq. 2}$$

| <b>Table S5. Assembly Factors with Shared Motif Signatures</b>                                                                                                                                                                                                                                                                                                                                                                                                                                                                                                                                                                                                                                                                                                                                                                                                                                                                                                                                                                                                                                                                                                                                                                                                                                                                   |                                 |                                                                                     |                                                   |                                      |                                                                                                                                       |                        |
|----------------------------------------------------------------------------------------------------------------------------------------------------------------------------------------------------------------------------------------------------------------------------------------------------------------------------------------------------------------------------------------------------------------------------------------------------------------------------------------------------------------------------------------------------------------------------------------------------------------------------------------------------------------------------------------------------------------------------------------------------------------------------------------------------------------------------------------------------------------------------------------------------------------------------------------------------------------------------------------------------------------------------------------------------------------------------------------------------------------------------------------------------------------------------------------------------------------------------------------------------------------------------------------------------------------------------------|---------------------------------|-------------------------------------------------------------------------------------|---------------------------------------------------|--------------------------------------|---------------------------------------------------------------------------------------------------------------------------------------|------------------------|
|                                                                                                                                                                                                                                                                                                                                                                                                                                                                                                                                                                                                                                                                                                                                                                                                                                                                                                                                                                                                                                                                                                                                                                                                                                                                                                                                  | <b>Signature Name, Activity</b> | <b>Color code</b>                                                                   | <b>Prototypes</b>                                 | <b>Number of Motifs in Prototype</b> | <b>Proteins with Variant Motif Signatures</b>                                                                                         | <b>Larger Grouping</b> |
| 1                                                                                                                                                                                                                                                                                                                                                                                                                                                                                                                                                                                                                                                                                                                                                                                                                                                                                                                                                                                                                                                                                                                                                                                                                                                                                                                                | DExD/H-box                      |    | Dbp7, [Dbp8], Dbp9                                | 10                                   | Dbp3, Dbp4, Dpb6, Dbp10, [Dhr1], Dhr2, Drs1, Fal1, [Has1], Mak5, [Prp43], Rok1, [Rrp3], Spb4                                          | NTPases                |
| 2                                                                                                                                                                                                                                                                                                                                                                                                                                                                                                                                                                                                                                                                                                                                                                                                                                                                                                                                                                                                                                                                                                                                                                                                                                                                                                                                | GTPase/AAA ATPase               |    | Rea1                                              | 3                                    | Bms1, [Fun12c], Lsg1c, Nog1, Nog2/Nug2, Nug1, [Sen1]                                                                                  |                        |
| 3                                                                                                                                                                                                                                                                                                                                                                                                                                                                                                                                                                                                                                                                                                                                                                                                                                                                                                                                                                                                                                                                                                                                                                                                                                                                                                                                | ATPase                          |    | Drg1c, Rix7                                       | 8                                    |                                                                                                                                       |                        |
| 4                                                                                                                                                                                                                                                                                                                                                                                                                                                                                                                                                                                                                                                                                                                                                                                                                                                                                                                                                                                                                                                                                                                                                                                                                                                                                                                                | snoRNP                          |    | Nop56, Nop58                                      | 9                                    |                                                                                                                                       | snoRNP proteins        |
| 5                                                                                                                                                                                                                                                                                                                                                                                                                                                                                                                                                                                                                                                                                                                                                                                                                                                                                                                                                                                                                                                                                                                                                                                                                                                                                                                                | HMG-like                        |    | Nhp2, Snu13                                       | 7                                    | (Cic1/Nsa3)                                                                                                                           |                        |
| 6                                                                                                                                                                                                                                                                                                                                                                                                                                                                                                                                                                                                                                                                                                                                                                                                                                                                                                                                                                                                                                                                                                                                                                                                                                                                                                                                | Gar1                            |    | Gar1                                              | 1                                    |                                                                                                                                       |                        |
| 7                                                                                                                                                                                                                                                                                                                                                                                                                                                                                                                                                                                                                                                                                                                                                                                                                                                                                                                                                                                                                                                                                                                                                                                                                                                                                                                                | RRM                             |    | Mrd1, Nop4, Nop12, Nop13, Nop15, [Nsr1]           | 5                                    | Esf2, Nop6, Nop8, (Rrp7)                                                                                                              | RNA-binding            |
| 8                                                                                                                                                                                                                                                                                                                                                                                                                                                                                                                                                                                                                                                                                                                                                                                                                                                                                                                                                                                                                                                                                                                                                                                                                                                                                                                                | Brix domain                     |    | Ssf1, Ssf2                                        | 4                                    | Brx1, Imp4, Rpf1, Rpf2                                                                                                                |                        |
| 9                                                                                                                                                                                                                                                                                                                                                                                                                                                                                                                                                                                                                                                                                                                                                                                                                                                                                                                                                                                                                                                                                                                                                                                                                                                                                                                                | Methyl Transferases             |    | Nop1                                              | 3                                    | Bmt2, Bud23, [Dim1], Emg1, Nop2, Rcm1, Rrp8, Spb1, [YGR283C]                                                                          |                        |
| 10                                                                                                                                                                                                                                                                                                                                                                                                                                                                                                                                                                                                                                                                                                                                                                                                                                                                                                                                                                                                                                                                                                                                                                                                                                                                                                                               | KH domain                       |    | Dim2, Krr1                                        | 3                                    |                                                                                                                                       | Structural             |
| 11                                                                                                                                                                                                                                                                                                                                                                                                                                                                                                                                                                                                                                                                                                                                                                                                                                                                                                                                                                                                                                                                                                                                                                                                                                                                                                                               | ARM/HEAT                        |    | Ipi1, Nop9, Puf6, Rrp12, Sda1, Sgd1, Utp10, Utp20 | 1                                    | Mak21/Noc1, Noc3, (Noc4/Utp19)                                                                                                        |                        |
| 12                                                                                                                                                                                                                                                                                                                                                                                                                                                                                                                                                                                                                                                                                                                                                                                                                                                                                                                                                                                                                                                                                                                                                                                                                                                                                                                               | WD repeat and WD-like           |    | Nan1/Utp17, Rrp9, Utp4, Utp18                     | 6                                    | Enp2, Erb1, (Esf1), Ipi3, Mak11, (Nsa1), Rrb1, (Rrp5), Rsa4, Sof1, Utp1, (Utp5), Utp6, Utp7, (Utp9), Utp12, Utp13, Utp15, Utp21, Ytm1 |                        |
| 13                                                                                                                                                                                                                                                                                                                                                                                                                                                                                                                                                                                                                                                                                                                                                                                                                                                                                                                                                                                                                                                                                                                                                                                                                                                                                                                               | Prolyl isomerase                |    | Fpr3, Fpr4                                        | 8                                    |                                                                                                                                       | Other                  |
| 14                                                                                                                                                                                                                                                                                                                                                                                                                                                                                                                                                                                                                                                                                                                                                                                                                                                                                                                                                                                                                                                                                                                                                                                                                                                                                                                               | Zn-finger                       |    | Bud20, Jjj1                                       | 5                                    | Rei1                                                                                                                                  |                        |
| 15                                                                                                                                                                                                                                                                                                                                                                                                                                                                                                                                                                                                                                                                                                                                                                                                                                                                                                                                                                                                                                                                                                                                                                                                                                                                                                                               | Kinases                         |   | Rio2c                                             | 5                                    | Rio1c                                                                                                                                 |                        |
| 16                                                                                                                                                                                                                                                                                                                                                                                                                                                                                                                                                                                                                                                                                                                                                                                                                                                                                                                                                                                                                                                                                                                                                                                                                                                                                                                               | PUA domain                      |  | Cbf5*, Nip7                                       | 3                                    |                                                                                                                                       | Various                |
| 17                                                                                                                                                                                                                                                                                                                                                                                                                                                                                                                                                                                                                                                                                                                                                                                                                                                                                                                                                                                                                                                                                                                                                                                                                                                                                                                               | GTP-binding                     |  | Efl1c                                             | 10                                   |                                                                                                                                       |                        |
| 18                                                                                                                                                                                                                                                                                                                                                                                                                                                                                                                                                                                                                                                                                                                                                                                                                                                                                                                                                                                                                                                                                                                                                                                                                                                                                                                               | Unknown                         |  | Utp3                                              | 2                                    | Lcp5                                                                                                                                  | Various                |
| 19                                                                                                                                                                                                                                                                                                                                                                                                                                                                                                                                                                                                                                                                                                                                                                                                                                                                                                                                                                                                                                                                                                                                                                                                                                                                                                                               |                                 |  | Sdo1                                              | 1                                    |                                                                                                                                       |                        |
| <b>Assembly Factors without Shared Motif Signatures</b>                                                                                                                                                                                                                                                                                                                                                                                                                                                                                                                                                                                                                                                                                                                                                                                                                                                                                                                                                                                                                                                                                                                                                                                                                                                                          |                                 |                                                                                     |                                                   |                                      |                                                                                                                                       |                        |
| Alb1, Arx1, Bfr2, Bud21, Bud22, Cgr1, Ebp2, Efg1, Enp1, [Fcf2], [Fyv7], Imp3, Kre33, Kri1, Las1, Loc1, Ltv1c, Mak16, Mpp10, Mrt4, Ngl2, [Nob1], Noc2, Nop7, Nop16, Npa1/Urb1, Npa2, Nsa2, Pfa1/Sqs1c, Rcl1, Rix1, Rlp7, Rlp24, Rnt1, Rrp1, Rrp6, Rrp15, Rrs1, Rrt14, Rsa3, [Slx9], Snm1, Tif6, Tri1, Utp2, Utp8, Utp11, Utp14, Utp22, [Utp24/Fcf1], Yvh1.                                                                                                                                                                                                                                                                                                                                                                                                                                                                                                                                                                                                                                                                                                                                                                                                                                                                                                                                                                        |                                 |                                                                                     |                                                   |                                      |                                                                                                                                       |                        |
| <p>Color scheme: Green for 5'-ETS, Blue for pre-40S, Red for pre-LSU.</p> <p>Motif signatures under consideration are listed by the <i>Saccharomyces</i> Genome Database. If a motif is found in only a single AF, that AF is considered to lack shared motifs.</p> <p>Variant motif signatures can have more or fewer of the motifs by comparison to the prototypes.</p> <p>Entries in parentheses are marginally-related to the groups in which they are included.</p> <p>Domain assignments for AFs in brackets are provisional, judging from differences between two publications [6, 7].</p> <p>* Cbf5 is the pseudouridine synthase of H/ACA snoRNPs. These proteins have been recovered in association with the pre-40S segment of rRNA, unlike Nop1 and other box C/D snoRNP proteins, that are recovered with the 5'-ETS [6, 7].</p> <p>The suffix, c, signifies that the AF localizes largely to the cytoplasm.</p> <p>@ Low-stringency BLAST searches detect the following relations: Mrt4 with Rpp0, Tri1 with Uaf30 and Enp1, Fcf1/Utp24 with Utp23, and Tif6 with eIF6. Rlp7 and Rlp24 are considered placeholders for Rpl7 and Rpl24 [8] and Rrs1 binds Rpl11.</p> <p>The colors indicate the segments of rRNA with which the AFs are associated: Green: 5'-ETS, Blue: pre-40S, Red: pre-LSU. Purple: snoRNP.</p> |                                 |                                                                                     |                                                   |                                      |                                                                                                                                       |                        |

**Table S5** Hierarchic Clustering Motif Signatures - relevant to Figure 3D

AFs with motif(s) that are shared with at least one other AF were tabulated and assigned to 19 groups ("motif signatures"). The lower part of the table lists the AFs that do not share motif signatures with others.

**Table S6. RNA-Binding Proteins Associated with rRNA Domains**

|                        | 5'-ETS                                                                                                            | pre-40S domains           |                                                                 |                                                              |                                 | ITS 1      | pre-LSU domains                           |                                           |             |            |            |            |                               |             |
|------------------------|-------------------------------------------------------------------------------------------------------------------|---------------------------|-----------------------------------------------------------------|--------------------------------------------------------------|---------------------------------|------------|-------------------------------------------|-------------------------------------------|-------------|------------|------------|------------|-------------------------------|-------------|
| RNA domain             | ETS                                                                                                               | 5' Domain                 | Central                                                         | 3' Major                                                     | 3' Minor                        | ITS1       | ITS2-Ssf1                                 | D1                                        | D2          | D3         | D4         | D5         | D6                            | late        |
| RRM, KH, S4 or pumilio | Imp3 (10.3)                                                                                                       | <u>Esf2</u> (8.4)         | Kri1 (4.7)<br><u>Krr1</u> (10.1)<br>Nsr1 <sup>In</sup> (4.6)    | <u>Mrd1</u> (6.5)<br>Nop6 (10.9)<br>Nop9 <sup>In</sup> (8.4) | Pno1 (9.7)                      | Rrp5 (6.1) |                                           | Nop12 (10.1)<br>Nop15 (9.9)<br>Rrp5 (6.1) | Nop4 (9.7)  |            | Puf6 (6.9) |            | <u>Nop8<sup>F</sup></u> (5.7) | Nop13 (9.9) |
| DExD/H                 |                                                                                                                   | Dbp4 (7.5)<br>Dbp8 (10.2) | Rok1 (9.7)                                                      |                                                              | Dhr1 (6.3)<br><u>Dhr2</u> (9.2) |            | Dbp7* (9.8)<br>Dbp9* (9.7)<br>Dbp10 (9.7) | Has1 (9.9)                                |             | Drs1 (5.4) |            |            |                               |             |
| Brix domain            | Imp4 (9.5)                                                                                                        |                           |                                                                 |                                                              |                                 |            | <u>Ssf1</u> (10.0)<br>Ssf2 (9.7)          | Brx1 (9.8)                                | Rpf1 (10.1) |            |            | Rpf2 (9.6) |                               |             |
| MeTransferase          |                                                                                                                   |                           |                                                                 | Emg1 (8.6)                                                   | Rrp8 (10.1)                     |            |                                           |                                           |             |            |            |            | <u>Nop2</u> (4.7)             |             |
| snoRNP proteins        | Nop1 (10.8)<br><u>Nop5</u> <sub>6</sub> (9.4)<br><u>Nop5</u> <sub>8</sub> (9.5)<br><u>Snu1</u> <sub>3</sub> (8.0) |                           | Cbf5 (9.3)<br>Gar1 (12.0)<br><u>Nhp2</u> (10.4)<br>Nop10 (10.8) |                                                              |                                 |            |                                           |                                           |             |            |            |            |                               |             |

Derived from experiments in which AFs have been recovered along with 3'-truncated segments of rRNA [6, 7, 9, 10].  
 The superscripts (In, F) designate AFs that belong to the SSU-In or LSU-F subsets.  
 IEP values from the *Saccharomyces* Genome Database are indicated in parentheses.  
 The underlined AFs interact with Nop1 on the basis of biochemical and genetic experiments, as is summarized in the *Saccharomyces* Genome Database.



**Table S6** Assembly Factors Associated with Successive rRNA Domains - related to Table 3, Figure 4A.

The RNA-binding proteins listed were identified in experiments using 3'-truncated rRNAs that were expressed in yeast, retrieved from lysates and analyzed, as described in the text. Their IEPs are indicated in parentheses. Many additional AFs are also known to contact rRNA judging from cross-linking studies and cryo-EM studies. The column entitled ITS2-Ssf1 corresponds to a very early LSU precursor.

**Table S7. Subsets of Assembly Factors in More Primitive Cell Types**

| Subset of AFs                                                                                                                                                     | Orthologs in LECA *                                                                          | Orthologs in <i>Archaea</i>   | Candidates in <i>E. coli</i>                                                                                                                        |
|-------------------------------------------------------------------------------------------------------------------------------------------------------------------|----------------------------------------------------------------------------------------------|-------------------------------|-----------------------------------------------------------------------------------------------------------------------------------------------------|
| SSU-F                                                                                                                                                             | Dbp8, Dhr2, Fyv7, #Nan1/Utp17, Noc4, Rrp7, #Utp5, #Utp6, #Utp13, #Utp15, Utp25               |                               | ARB1, BUD23, CDC14, CFD1, DBP5, DBP8, DED1, DIM1, DIS3<br>DRS1, FPR3, Kre33, MDN1, MTR4, NOP2, RCL1, REX2, RIX7, RLI1, RNT1, ROK1, RRP5, RRP6, SKI6 |
| SSU-In                                                                                                                                                            | Efg1, Nsr1                                                                                   |                               |                                                                                                                                                     |
| LSU-F                                                                                                                                                             | Dbp6, Npa1/Urb1, Npa2/Urb2                                                                   |                               |                                                                                                                                                     |
| LSU-Ou                                                                                                                                                            | Brx1, Cic1, Mak11, Mrt4, Noc2, Noc3, Nop4, Nop7, Nop13, Nop15, Nop16, Puf6, Rrp1, Ytm1, Ssf1 | Nog1, Rix7, Tif6              |                                                                                                                                                     |
| snoRNP                                                                                                                                                            | Gar1, Nhp2, Nop56/Sik1, Nop58                                                                | Gar1, Nop1, Nop10, Nop56/Sik1 |                                                                                                                                                     |
| shared                                                                                                                                                            | Dbp3, Prp43                                                                                  |                               |                                                                                                                                                     |
| Derived from [11]. * We have included only those AFs that we have localized. # These AFs associate with the 5-ETS in yeast: Utp5, Utp6, Utp13, Utp15, Nan1/Utp17. |                                                                                              |                               |                                                                                                                                                     |

**Table S7** Assembly Factors in Evolutionary Context - related to Table 1

Comparison of each subunit-specific subset with the likely repertoire of AFs in more primitive organisms. Based on [11].

## Supplementary Figures and Legends

Figure S1

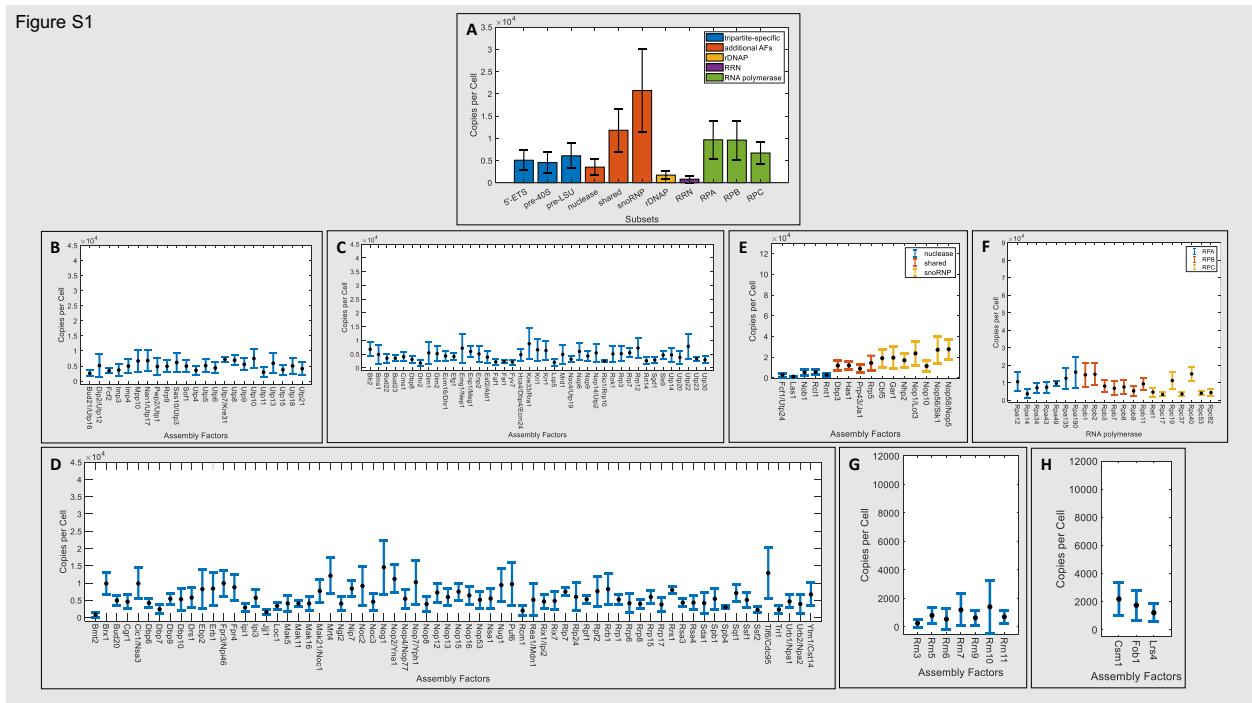

**Figure S1** Copy Number per Cell of Single Assembly Factors - related to Figure 2

**(A) Copy number estimate bar graphs.** Mean values and standard deviations for single AFs as well as proteins associated with rDNA, and RNA polymerases. See Figure S1 and Table S4 for detail. Outlier values for each AF (based on the IQR rule - see Methods) and outlier AFs for each subset (due to unreasonably high standard deviations) were removed before these calculations were made. The following AFs were removed: Nsr1/She5, Nsa2, Hmo1, Top1 and Top2.

The representation is as in Figure 2 but concerns single proteins of **(B) 5'-ETS**, **(C) pre-40S**, **(D) pre-LSU**, **(E) additional AFs**, **(F) RNA polymerase**, **(G) Rrn proteins**, **(H) rDNAPs**. Outlier values for each AF were removed from consideration (Nsr1/She5, Nsa2, Hmo1, Snu13, Top1 and Top2). Nuclease: nucleases that cleave rRNA, Shared:

proteins needed to make both SSU and LSU, RPA/B/C: subunits of RNA polymerase A/B/C, Rrn: regulators of RNA polymerase A, rDNAPs: proteins that colocalize with the rDNA filament. For identification of the subsets of AFs, see Table S1.

Figure S2

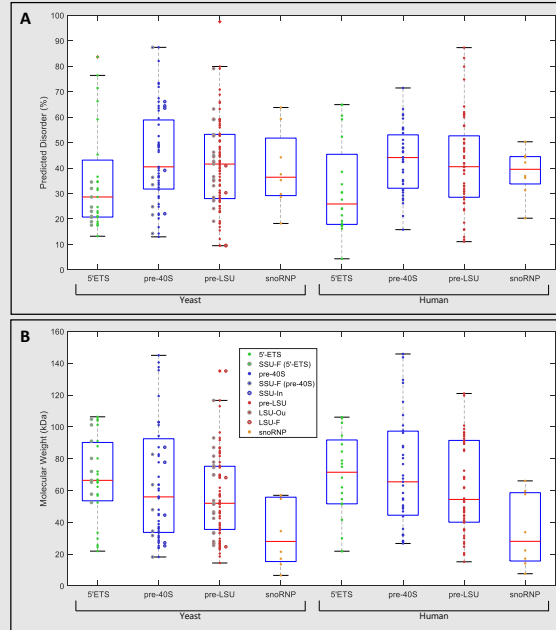

**Figure S2** Predicted Disorder and Molecular Weight of Yeast and Human Assembly Factors

Assembly factors were grouped - as in Figure 3A - to illustrate the characteristics of those that associate with the 5'-ETS, the pre-40S segment, or the pre-LSU segment. In each case, the central column of values includes all relevant AFs listed in Table S2. For the 5'-ETS, the points to the left are SSU-F. For the pre-40S, the points to the left are SSU-F and the points to the right are SSU-In. For the pre-LSU, the points to the left are LSU-Ou and the points to the right are LSU-F. Human AFs are subgrouped according to the information for their yeast homologs.

Figure S3

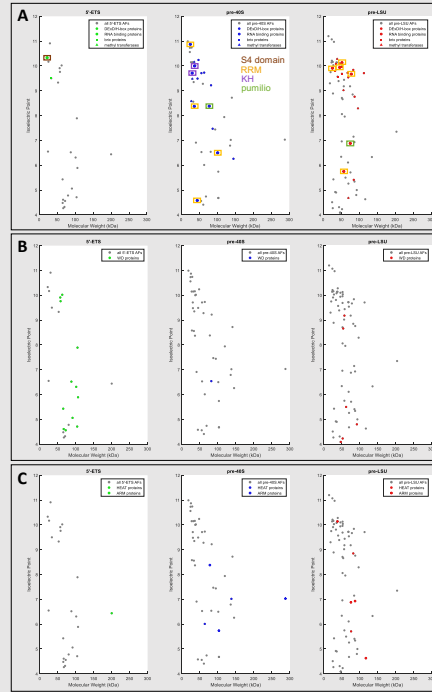

**Figure S3** Overlay Representation of Physical Properties for Subsets of Assembly Factors - related to the 2-dimensional plots of Figure 3B/C

All AFs present in the each of the tripartite domains are shown in gray.

**(A) RNA-associated proteins.** The AFs in the upper quadrants include those with RNA-binding motifs (RRMs, KH and pumilio domains). They have a mean IEP of pH 8.5 and mean size of 64 kDa (pH 8.5, 64 kDa), DExD/H-box proteins (pH 8.7, 77 kDa), the methyl transferases (pH 9.0, 49 kDa), and Brix domain proteins (pH 9.8, 41 kDa). snoRNP proteins, although not illustrated, have the following mean values (pH 10.0, 32 kDa).

**(B) WD-repeat proteins.** The AFs with WD repeats are found mostly in the lower two quadrants (pH 6.6, 54 kDa).

**(C) HEAT/ARM-repeat proteins.** The AFs with HEAT repeats (pH 6.8, 107 kDa) and ARM repeats (pH 7.1, 116 kDa) have broadly distributed IEPs.

Figure S4

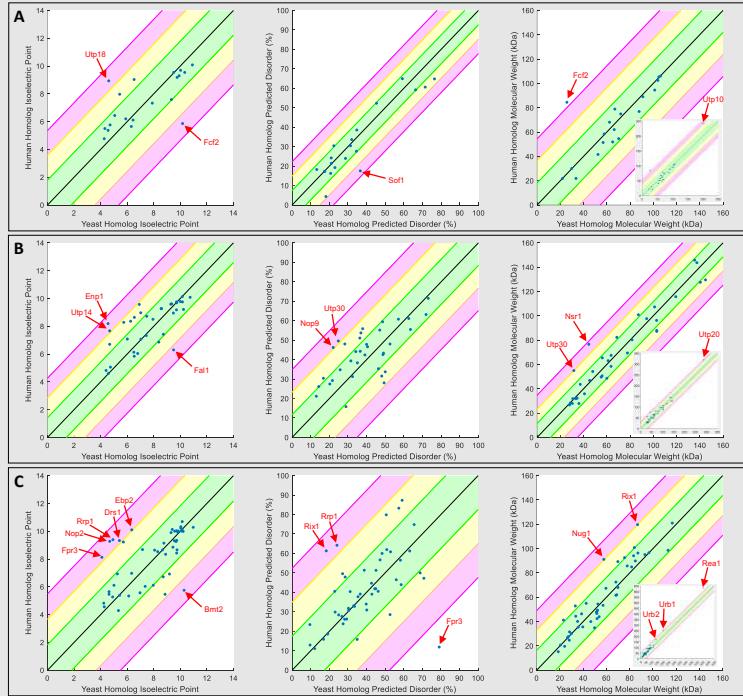

**Figure S4** Yeast vs Human Comparison of Physical Properties of Assembly Factors - related to Figure 3

The comparative diagonal plots show isoelectric points, predicted disorder and molecular weights of **(A)** 5'-ETS, **(B)** pre-40S and **(C)** pre-LSU AFs. Colored margins indicate how far away yeast and human values are from each other, with green being 1 standard deviation, yellow being 2 standard deviations, and pink being 3 standard deviations. AF pairs were considered outliers if the difference between their yeast and human values (when compared to all AFs in their subset) was more than 2 standard deviations away from 0. These are indicated with red arrows using yeast names.



Figure S5

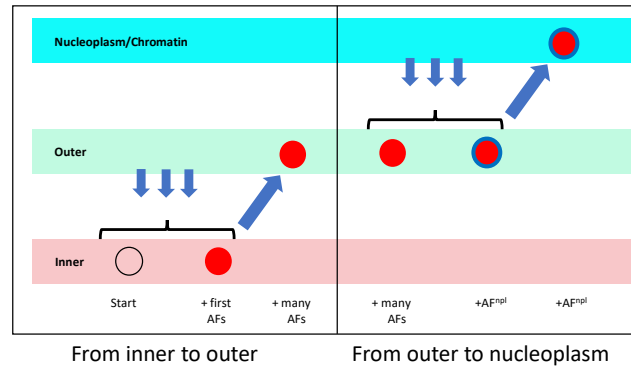

### Figure S5 Vectorial 2-Phase Partitioning

On the left, in a typical T-diagram, we illustrate the progressive loading of AFs onto nascent rRNA within the inner compartment. At "start," no AFs have been added so the circle is empty. Due to arrival of latent AFs from the outer layer (vertical blue arrows) the nascent rRNPs progressively acquires AFs (red filling) and becomes phase compatible with the outer layer/volume. The nascent particles therefore shift in an energetically downhill fashion to the outer layer/volume. At the right, the further maturation of precursor particles that reside in the outer layer. Since multiple AFs that are conspicuous in the nucleoplasm are also found in the outer compartment, we propose that when they arrive in the outer layer (blue arrows) they bind to the surface of immature particles (represented by the blue surface on the red particles). Those particles therefore can diffuse in energetically neutral fashion into the nucleoplasmic volume. Our previous article [1] introduces the use of T-diagrams.

## Literature Cited

1. Tartakoff, A.M., et al., *The nucleolus as a polarized coaxial cable in which the rDNA axis is surrounded by dynamic subunit-specific phases*. *Curr Biol*, 2021. **31**(12): p. 2507-2519 e4.
2. Giaever, G., et al., *Functional profiling of the *Saccharomyces cerevisiae* genome*. *Nature*, 2002. **418**(6896): p. 387-91.
3. Bohnsack, K.E. and M.T. Bohnsack, *Uncovering the assembly pathway of human ribosomes and its emerging links to disease*. *EMBO J*, 2019. **38**(13): p. e100278.
4. Farley-Barnes, K.I., L.M. Ogawa, and S.J. Baserga, *Ribosomopathies: Old Concepts, New Controversies*. *Trends Genet*, 2019. **35**(10): p. 754-767.
5. Ho, B., A. Baryshnikova, and G.W. Brown, *Unification of Protein Abundance Datasets Yields a Quantitative *Saccharomyces cerevisiae* Proteome*. *Cell Syst*, 2018. **6**(2): p. 192-205 e3.
6. Zhang, L., et al., *Stepwise and dynamic assembly of the earliest precursors of small ribosomal subunits in yeast*. *Genes Dev*, 2016. **30**(6): p. 718-32.
7. Chaker-Margot, M., et al., *Stage-specific assembly events of the 6-MDa small-subunit processome initiate eukaryotic ribosome biogenesis*. *Nat Struct Mol Biol*, 2015. **22**(11): p. 920-3.
8. Espinar-Marchena, F.J., R. Babiano, and J. Cruz, *Placeholder factors in ribosome biogenesis: please, pave my way*. *Microb Cell*, 2017. **4**(5): p. 144-168.
9. Chen, W., et al., *Stepwise assembly of the earliest precursors of large ribosomal subunits in yeast*. *Nucleic Acids Res*, 2017.
10. Hunziker, M., et al., *Conformational switches control early maturation of the eukaryotic small ribosomal subunit*. *Elife*, 2019. **8**.
11. Ebersberger, I., et al., *The evolution of the ribosome biogenesis pathway from a yeast perspective*. *Nucleic Acids Res*, 2014. **42**(3): p. 1509-23.
